# Supplementary material for: A Comprehensive Machine Learning Framework for the Exact Prediction of the Age of Onset in Familial and Sporadic Alzheimer’s Disease
Source: MDPI journal article supplement (doi:10.3390/diagnostics11050887), 2021-05-17
Supplement: s1 [file s1]

# Supplementary Material

## Predictive Genomics Models of Alzheimer's disease age of onset

We used Machine Learning (ML) algorithms to construct predictive models of Alzheimer's disease age of onset (ADAOO) as implemented in the R caret package (Kunh, 2020). Table S1 shows the ML algorithms used in this study.<sup>1</sup> In all cases, the set of predictors for ADHD severity consisted of demographic variables, genetic markers and ADHD affection status. See the Methods section in the main manuscript for more details.

**Table S1.** ML algorithms used to predict ADAOO.

| Method     | Model                                 | Tuning parameters                                                             |
|------------|---------------------------------------|-------------------------------------------------------------------------------|
| avNNet     | Model Averaged Neural Network         | size, decay, bag                                                              |
| bstTree    | Boosted Tree                          | mstop, maxdepth, nu                                                           |
| gbm        | Stochastic Gradient Boosting          | n.trees, interaction.depth, shrinkage, n.minobsinnode                         |
| glmboost   | Boosted Generalized Linear Model      | mstop, prune                                                                  |
| glmnet     | glmnet                                | alpha, lambda                                                                 |
| knn        | k-Nearest Neighbors                   | k                                                                             |
| lasso      | The lasso                             | fraction                                                                      |
| lda        | Linear discriminant analysis          | None                                                                          |
| mlp        | Multi-Layer Perceptron                | size                                                                          |
| rf         | Random Forest                         | mtry                                                                          |
| rpart      | CART                                  | cp                                                                            |
| rpart1SE   | CART                                  | None                                                                          |
| rpart2     | CART                                  | maxdepth                                                                      |
| svmLinear  | SVM with Linear Kernel                | C                                                                             |
| svmLinear2 | SVM with Linear Kernel                | Cost                                                                          |
| svmPoly    | SVM with Polynomial kernel            | degree, scale, C                                                              |
| svmRadial  | SVM with Radial Basis Function Kernel | sigma, C                                                                      |
| treebag    | Bagged CART                           | None                                                                          |
| xgbLinear  | eXtreme Gradient Boosting (XGBoost)   | nrounds, lambda, alpha, eta                                                   |
| xgbTree    | eXtreme Gradient Boosting Tree        | nrounds, max_depth, eta, gamma, colsample_bytree, min_child_weight, subsample |

CART: Classification and Regression Tree (CART); (L. Breiman, Friedman, Olshen, & Stone, 1984) RF: Random Forest (RF);(L. Breiman, 2001; Satterfield, Cantwell, & Satterfield) SVM: Support Vector Machine (SVM);(Cortes & Vapnik, 1995; Salazar, Vélez, & Salazar, 2012) XGBoost: eXtreme Gradient Boosting.(Chen & Guestrin, 2016; Chen et al., 2020).

<sup>1</sup> The complete list of ML algorithms implemented in caret is available at <https://topepo.github.io/caret/available-models.html>

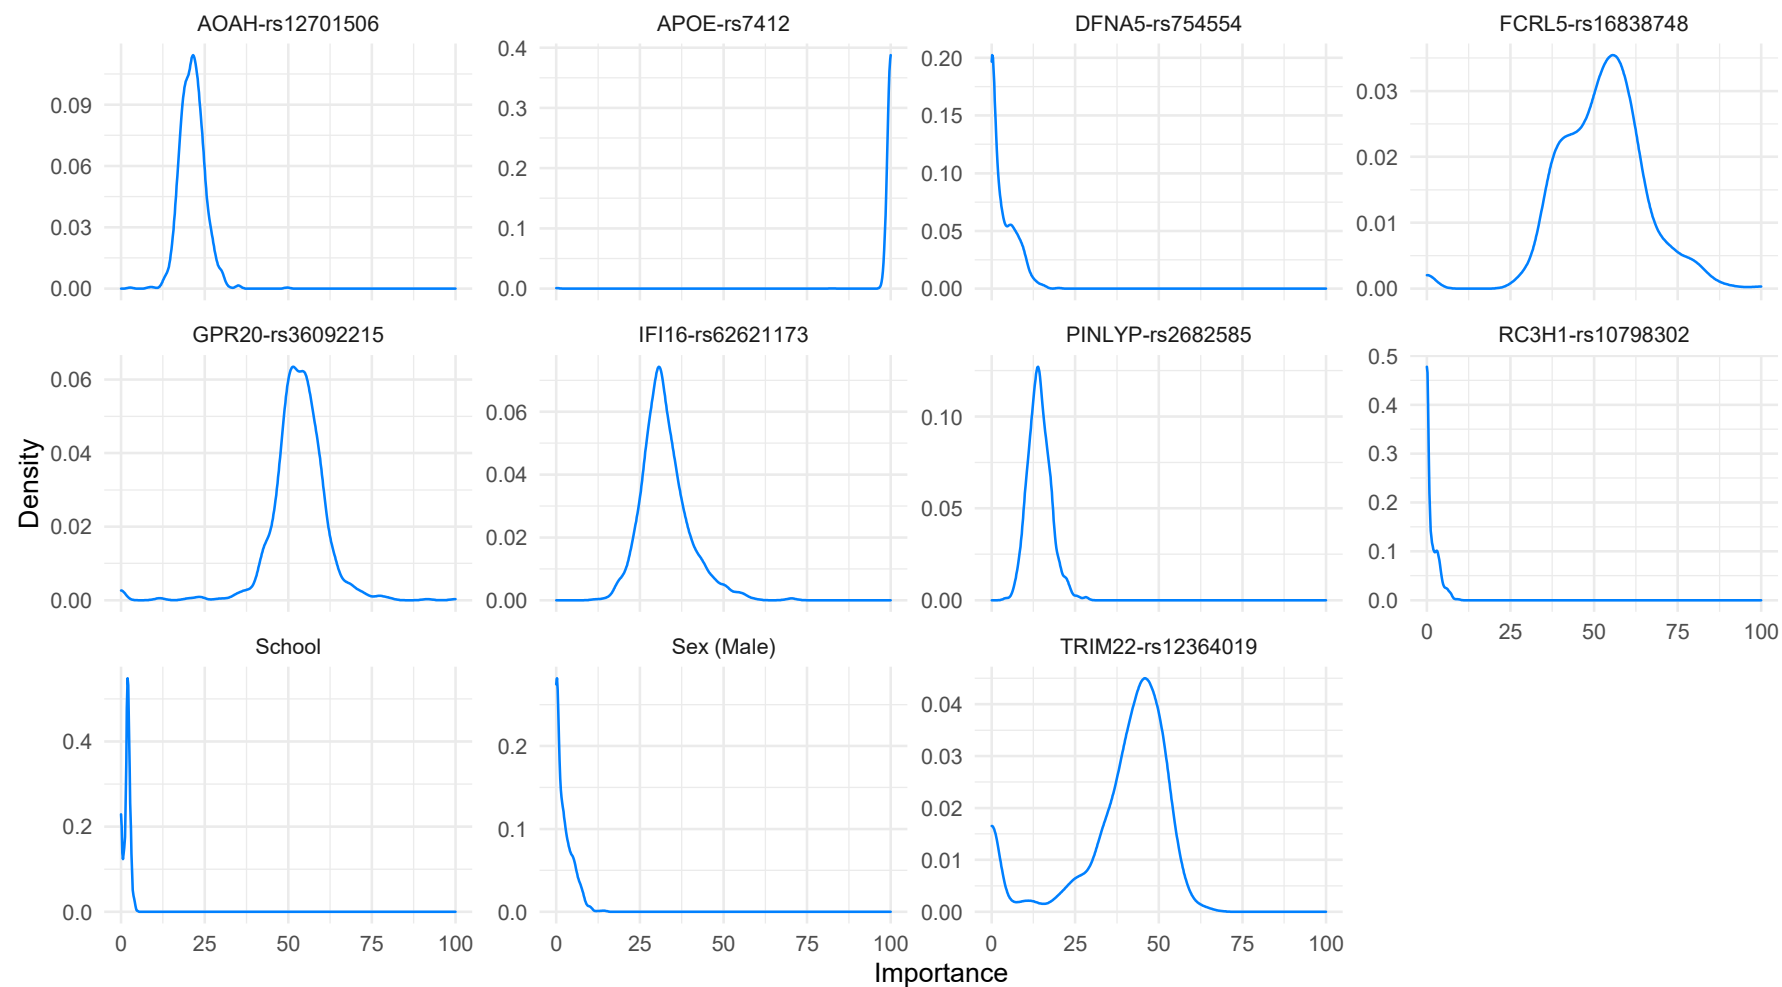

**Figure S1.** Variable importance bootstrap-based density distribution for ADAOO predictors in E280A AD using the glmboost ML algorithm.

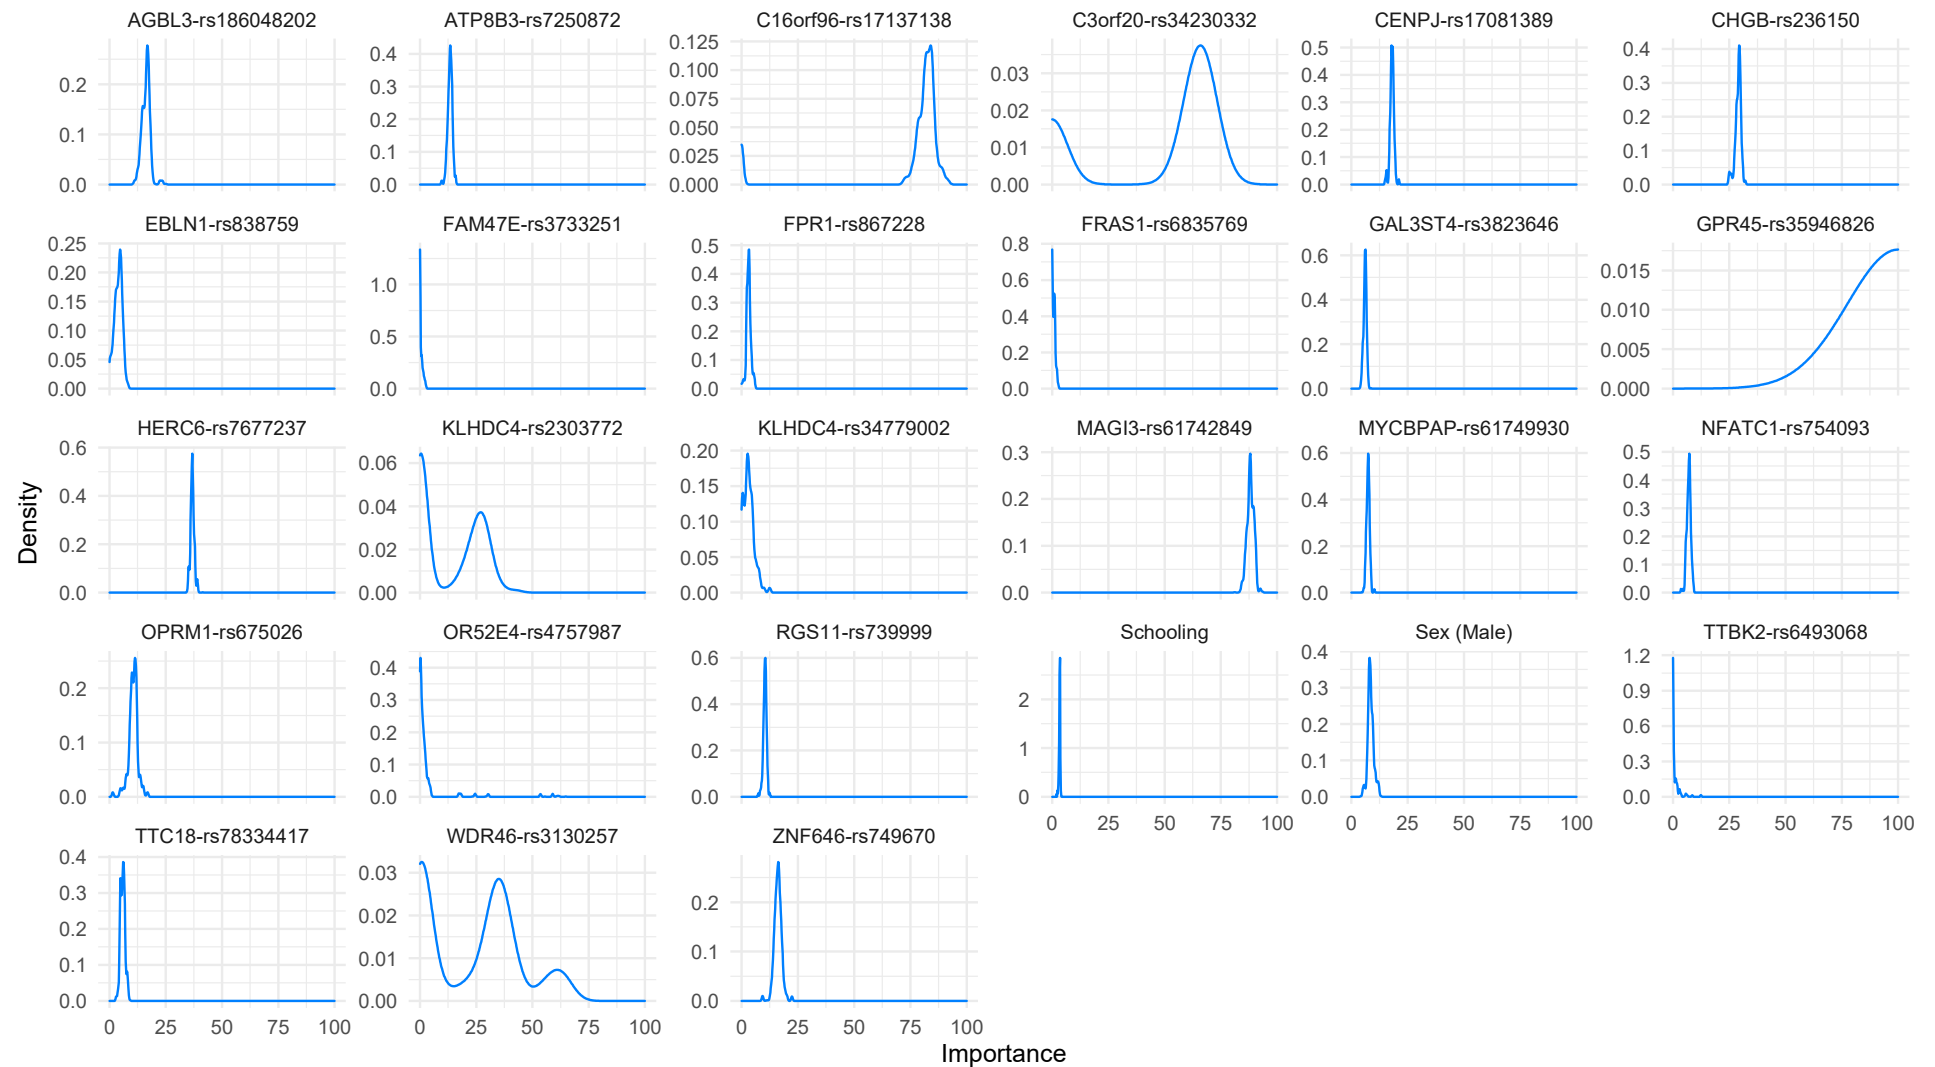

**Figure S2.** Variable importance bootstrap-based density distribution for ADAOO predictors in sAD using the glmnet ML algorithm.

## References

1. Breiman, L. (2001). Random Forests. In R. E. Schapire (Ed.), *Machine Learning* (Vol. 45, pp. 5-32). Statistics Department, University of California, Berkeley, CA 94720: Kluwer Academic Publishers. Manufactured in The Netherlands.
2. Breiman, L., Friedman, J. H., Olshen, R. A., & Stone, C. H. (1984). *Classification and Regression Trees*. Belmont, CA: Wadsworth International Group, Inc.
3. Chen, T., & Guestrin, C. (2016). *XGBoost: A Scalable Tree Boosting System*. Paper presented at the 22nd SIGKDD Conference on Knowledge Discovery and Data Mining. <https://arxiv.org/abs/1603.02754>
4. Chen, T., He, T., Benesty, M., Khotilovich, V., Tang, Y., Cho, H., . . . Li, Y. (2020). xgboost: Extreme Gradient Boosting. R package version 1.0.0.2. URL: <https://CRAN.R-project.org/package=xgboost>.
5. Cortes, C., & Vapnik, V. (1995). Support-vector networks. *Machine Learning*, 20, 273-297. doi:<https://doi.org/10.1007/BF00994018>
6. Kunh, M. (2020). caret: Classification and Regression Training. (Version R package version 6.0-86). Retrieved from <https://CRAN.R-project.org/package=caret>
7. Salazar, D. A., Vélez, J. I., & Salazar, J. C. (2012). Comparison between SVM and Logistic Regression: Which one is Better to Discriminate? *Revista Colombiana de Estadística*, 35(2), 223-237.
8. Satterfield, J. H., Cantwell, D. P., & Satterfield, B. T. (1974). Pathophysiology of the hyperactive child syndrome. *Arch Gen Psychiatry*, 31(6), 839-844. Retrieved from <https://www.ncbi.nlm.nih.gov/pubmed/4441251>.
